# Supplementary material for: [Retracted] Gastrocnemius Muscle Injury Is the Condition to Induce Cartilage Degeneration of the Rabbit Tibiofemoral Joint: A New Perspective
Source: Hindawi journal article supplement (doi:10.1155/2022/7532434), 2022-01-01
Supplement: f1 [file 7532434.f1.docx]

Kellgren and Lawrence grading system

| Grade | Imaging manifestations |
| --- | --- |
| 0 | Normal |
| Ⅰ | Suspected narrowing of joint space and minute osteophyte. |
| Ⅱ | Suspected narrowing of joint space. Definite osteophyte. |
| Ⅲ | Moderate diminution of joint space with sclerosing changes. A moderate number of osteophytes were formed. |
| Ⅳ | Joint space greatly impaired with sclerosis of subchondral bone and even shows obvious deformity. Numerous osteophytes were formed. |
